# Supplementary material
Source: PubMed Central journal article supplement (PMC10420898)
Supplement: NIHMS1840085-supplement-1.pdf [file NIHMS1840085-supplement-1.pdf]

**Supplemental Table 1***Detailed Manipulation Check Results*

|                                       | Positive<br>( <i>n</i> = 46)<br><i>M</i> ( <i>SD</i> ) | Negative<br>( <i>n</i> = 52)<br><i>M</i> ( <i>SD</i> ) | Neutral<br>( <i>n</i> = 56)<br><i>M</i> ( <i>SD</i> ) | Test Statistic                                     |
|---------------------------------------|--------------------------------------------------------|--------------------------------------------------------|-------------------------------------------------------|----------------------------------------------------|
| <i>Changes in PANAS Emotion Items</i> |                                                        |                                                        |                                                       |                                                    |
| Overall Negative Emotions             | -1.76 (4.80)                                           | 4.43 (9.67)                                            | -2.66 (4.63)                                          | F(2, 151) = 16.86, <i>p</i> < .001, $\eta^2 = .18$ |
| Distressed                            | -0.49 (0.73) <sup>a</sup>                              | 0.86 (1.23)                                            | -0.39 (0.83) <sup>a</sup>                             | F(2, 151) = 31.65, <i>p</i> < .001, $\eta^2 = .30$ |
| Upset                                 | -0.42 (0.99) <sup>a</sup>                              | 0.97 (1.65)                                            | -0.55 (0.68) <sup>a</sup>                             | F(2, 151) = 26.86, <i>p</i> < .001, $\eta^2 = .26$ |
| Guilty                                | 0.03 (1.06)                                            | 0.31 (1.36)                                            | -0.32 (0.55) <sup>a</sup>                             | F(2, 150) = 4.85, <i>p</i> = .009, $\eta^2 = .06$  |
| Scared                                | 0.001 (0.83)                                           | 0.17 (1.17)                                            | -0.15 (0.82)                                          | F(2, 151) = 1.53, <i>p</i> = .22, $\eta^2 = .02$   |
| Hostile                               | -0.36 (0.65) <sup>a</sup>                              | 0.67 (1.53)                                            | -0.32 (0.51) <sup>a</sup>                             | F(2, 150) = 16.93, <i>p</i> < .001, $\eta^2 = .18$ |
| Irritable                             | -0.31 (0.85) <sup>a</sup>                              | 0.48 (1.24)                                            | -0.18 (0.87) <sup>a</sup>                             | F(2, 150) = 8.89, <i>p</i> < .001, $\eta^2 = .11$  |
| Ashamed                               | -0.20 (0.97) <sup>a</sup>                              | 0.58 (1.37)                                            | -0.37 (0.71) <sup>a</sup>                             | F(2, 151) = 12.18, <i>p</i> < .001, $\eta^2 = .14$ |
| Nervous                               | -0.003 (1.26)                                          | 0.15 (1.17)                                            | -0.14 (0.87)                                          | F(2, 151) = 0.94, <i>p</i> = .39, $\eta^2 = .01$   |
| Jittery                               | -0.21 (0.96) <sup>a</sup>                              | 0.37 (1.26)                                            | -0.18 (0.88) <sup>a</sup>                             | F(2, 151) = 5.05, <i>p</i> = .008, $\eta^2 = .06$  |
| Afraid                                | -0.02 (0.81)                                           | 0.11 (1.17)                                            | -0.09 (0.78)                                          | F(2, 151) = 0.58, <i>p</i> = .56, $\eta^2 = .01$   |
| Overall Positive Emotions             | 6.52 (7.50)                                            | -3.39 (6.26)                                           | -2.21 (5.76)                                          | F(2, 151) = 33.51, <i>p</i> < .001, $\eta^2 = .31$ |
| Interested                            | 0.62 (1.14)                                            | -0.38 (1.19) <sup>b</sup>                              | -0.16 (0.73) <sup>b</sup>                             | F(2, 151) = 12.49, <i>p</i> < .001, $\eta^2 = .14$ |
| Excited                               | 1.06 (1.31)                                            | -0.48 (1.04) <sup>b</sup>                              | -0.43 (0.94) <sup>b</sup>                             | F(2, 151) = 30.69, <i>p</i> < .001, $\eta^2 = .29$ |

## EMOTION DYSREGULATION AND RISK-TAKING

55

|                                                                                                                                              |             |                           |                             |                                             |
|----------------------------------------------------------------------------------------------------------------------------------------------|-------------|---------------------------|-----------------------------|---------------------------------------------|
| Strong                                                                                                                                       | 0.79 (1.35) | -0.28 (1.24) <sup>b</sup> | -0.39 (0.94) <sup>b</sup>   | $F(2, 151) = 15.12, p < .001, \eta^2 = .17$ |
| Enthusiastic                                                                                                                                 | 0.72 (1.43) | -0.65 (0.98) <sup>b</sup> | 0.01 (1.12) <sup>a, b</sup> | $F(2, 151) = 16.66, p < .001, \eta^2 = .18$ |
| Proud                                                                                                                                        | 1.32 (1.30) | -0.78 (1.26) <sup>b</sup> | -0.37 (1.03) <sup>b</sup>   | $F(2, 150) = 42.07, p < .001, \eta^2 = .36$ |
| Alert                                                                                                                                        | 0.07 (1.27) | 0.03 (1.33)               | -0.08 (1.13)                | $F(2, 150) = 0.19, p = .83, \eta^2 = .002$  |
| Inspired                                                                                                                                     | 1.25 (1.27) | -0.77 (0.82) <sup>b</sup> | -0.31 (1.06) <sup>b</sup>   | $F(2, 151) = 48.21, p < .001, \eta^2 = .39$ |
| Determined                                                                                                                                   | 0.42 (1.46) | -0.19 (1.51)              | -0.17 (1.18)                | $F(2, 151) = 3.09, p = .048, \eta^2 = .04$  |
| Attentive                                                                                                                                    | 0.04 (1.48) | 0.02 (1.15)               | -0.05 (1.37)                | $F(2, 151) = 0.94, p = .94, \eta^2 = .001$  |
| Active                                                                                                                                       | 0.23 (1.12) | -0.15 (1.26)              | -0.05 (1.14)                | $F(2, 149) = 1.39, p = .25, \eta^2 = .02$   |
| <i>Dissociation</i>                                                                                                                          | 3.62 (6.94) | 3.65 (4.69)               | 2.05 (4.33)                 | $F(2, 152) = 1.56, p = .21, \eta^2 = .02$   |
| <i>Emotional Disengagement</i>                                                                                                               |             |                           |                             |                                             |
| I tried to hold back or suppress my emotional reactions.                                                                                     | 2.81 (2.40) | 3.17 (2.75)               | 1.55 (1.99)                 | $F(2, 152) = 6.84, p = .001, \eta^2 = .08$  |
| I tried to think about the event depicted in the task in a way that would make me feel less distressed (e.g., reminding myself it was fake). | 2.72 (2.68) | 2.58 (2.44)               | 2.29 (2.69)                 | $F(2, 152) = 2.59, p = .68, \eta^2 = .01$   |
| I distracted myself while listening to the tape recording (e.g., thoughts about other things).                                               | 0.66 (1.46) | 1.00 (1.88)               | 1.11 (1.90)                 | $F(2, 151) = 0.87, p = .42, \eta^2 = .01$   |
| I focused on the less emotional details of the tape recording or shifted my attention when I                                                 | 1.60 (2.17) | 1.81 (2.06)               | 1.20 (2.21)                 | $F(2, 152) = 1.13, p = .33, \eta^2 = .02$   |

thought I might hear something  
upsetting.

---

*Note.* PANAS = Positive and Negative Affect Schedule; <sup>a</sup> Significant difference compared to negative emotion induction condition ( $p < .05$ ); <sup>b</sup> Significant difference compared to positive emotion induction condition ( $p < .05$ )
